# Supplementary material
Source: publisher figshare collection journal article supplement (https://acs.figshare.com/ndownloader/files/3843502)
Supplement: Supplementary file 1 [file 3843502]

data_general


_publ_section_synopsis
.
#Added by publCIF


_publ_section_related_literature
;
?
;
#Added by publCIF


#==============================================================================

_audit_creation_date                  '2014-03-28'
_audit_creation_method                 SHELXL-97
_audit_update_record
;
?

;

#==============================================================================

# SUBMISSION DETAILS

_publ_requested_journal               ''

_publ_requested_category              ?

_publ_contact_author_name             ''

_publ_contact_author_address
;
    Department of Chemistry,
    The University of Texas,
    One UTSA Circle,
    San Antonio, Texas 78249-0698,
    U.S.A.
;
_publ_contact_letter
;

;

_publ_requested_coeditor_name         '  '
_publ_contact_author_phone            '  '
_publ_contact_author_fax              ' '
_publ_contact_author_email
;
hadi.arman@utsa.edu
;


#==============================================================================

# PROCESSING SUMMARY (IUCr Office Use Only)

_journal_date_recd_electronic      ?
_journal_date_to_coeditor         ?
_journal_date_from_coeditor       ?
_journal_date_accepted     ?
_journal_date_printers_first      ?
_journal_date_printers_final      ?
_journal_date_proofs_out          ?
_journal_date_proofs_in           ?
_journal_coeditor_name            ?
_journal_coeditor_code            ?
_journal_paper_category      ?
_journal_coeditor_notes
;

;
_journal_techeditor_code      ?
_iucr_compatibility_tag          ACTA95
_journal_techeditor_notes
;

;
_journal_coden_ASTM               ?
_journal_name_full                ?
_journal_year                     ?
_journal_volume                   ?
_journal_issue                    ?
_journal_page_first               ?
_journal_page_last                ?
_journal_suppl_publ_number        ?
_journal_suppl_publ_pages         ?

#==============================================================================

# TITLE AND AUTHOR LIST

_publ_section_title
;

;

_publ_section_title_footnote
;
 Additional correspondence e-mail: 
;

loop_
_publ_author_name
_publ_author_address
'' 
; 
  Department of Chemistry 
  The University of Texas at San Antonio
  One UTSA Circle 
  San Antonio, Texas 78249-0698, USA
;


#==============================================================================

# TEXT

_publ_section_abstract
;
(type here to add abstract)
;

_publ_section_exptl_refinement
;
All H-atoms, on the title compound were located in a difference Fourier map
 and were refined with <i>U</i>~iso~(H) =1.2<i>U</i>~eq~(N). The worst
 reflections,with Delta(F^2)/esd > 5.0, were omitted. PLATON SQUEEZE 
command was used to remove disordered solvent moelcules from the crystal
 lattice. This resulted in a 1591 ang3 solvent void. Since solvent 
molecules were removed, from the crystal lattice, the calculated density 
was less than 1.0g/cm3.
;

#==============================================================================

_publ_section_exptl_prep
;
(type here to add preparation details)
;

#==============================================================================
_publ_section_comment
;
(type here to add)
;

_publ_section_references
;
Higashi, T. (1995). <i>ABSCOR</i>. Rigaku Corporation, Tokyo, Japan.

Johnson, C. K. (1976). <i>ORTEPII</i>. Report ORNL-5138. Oak Ridge National
Laboratory, Tennessee, USA.

Rigaku Americas Corporation (2008). <i>CrystalClear</i>. Rigaku/MSC Inc., The
Woodlands, Texas, USA.

Rueping, M., Kuenkel, A., Tato, F. & Bats, J. W. (2009). <i>Angew. Chem. Int.
Ed.</i> <b>48</b>, 3699--3702.

Sheldrick, G. M. (1997). <i>SHELXL97</i>. University of G\"ottingen, Germany.

Westrip, S. P. (2010). <i>publCIF</i>. <i>J. Appl. Cryst</i>. <b>43</b>.
Submitted.
;

_publ_section_acknowledgements
;
(type here to add acknowledgements)
;


_publ_section_figure_captions
;


(type here to add)
;      

_publ_section_table_legends
;

;          
 
data_MA-2 
 
_audit_creation_method            SHELXL-97 
_chemical_name_systematic 
; 
 ? 
; 
_chemical_name_common             ? 
_chemical_melting_point           ? 
_chemical_formula_moiety          
 'C3 H6 N6, C3 H7 N O' 
_chemical_formula_sum 
 'C6 H13 N7 O1' 
_chemical_formula_weight          199.23 
 
loop_ 
 _atom_type_symbol 
 _atom_type_description 
 _atom_type_scat_dispersion_real 
 _atom_type_scat_dispersion_imag 
 _atom_type_scat_source 
 'C'  'C'   0.0181   0.0091 
 'International Tables Vol C Tables 4.2.6.8 and 6.1.1.4' 
 'H'  'H'   0.0000   0.0000 
 'International Tables Vol C Tables 4.2.6.8 and 6.1.1.4' 
 'N'  'N'   0.0311   0.0180 
 'International Tables Vol C Tables 4.2.6.8 and 6.1.1.4' 
 'O'  'O'   0.0492   0.0322 
 'International Tables Vol C Tables 4.2.6.8 and 6.1.1.4' 


_symmetry_cell_setting            'tetragonal' 
_symmetry_space_group_name_H-M    'I4(1)/a' 
_symmetry_space_group_name_Hall   '-I 4ad'
 
loop_ 
 _symmetry_equiv_pos_as_xyz 
 'x, y, z' 
 '-y+3/4, x+1/4, z+1/4' 
 '-x+1/2, -y, z+1/2' 
 'y+3/4, -x+3/4, z+3/4' 
 'x+1/2, y+1/2, z+1/2' 
 '-y+5/4, x+3/4, z+3/4' 
 '-x+1, -y+1/2, z+1' 
 'y+5/4, -x+5/4, z+5/4' 
 '-x, -y, -z' 
 'y-3/4, -x-1/4, -z-1/4' 
 'x-1/2, y, -z-1/2' 
 '-y-3/4, x-3/4, -z-3/4' 
 '-x+1/2, -y+1/2, -z+1/2' 
 'y-1/4, -x+1/4, -z+1/4' 
 'x, y+1/2, -z' 
 '-y-1/4, x-1/4, -z-1/4' 
 
_cell_length_a                    12.150(2) 
_cell_length_b                    12.150(2) 
_cell_length_c                    24.405(2) 
_cell_angle_alpha                 90.00 
_cell_angle_beta                  90.00 
_cell_angle_gamma                 90.00 
_cell_volume                      3602.7(9) 
_cell_formula_units_Z             16 
_cell_measurement_temperature     98(2) 
_cell_measurement_reflns_used     6561 
_cell_measurement_theta_min       3.0 
_cell_measurement_theta_max       27.6 
 
_exptl_crystal_description        'platelet' 
_exptl_crystal_colour             'colourless' 
_exptl_crystal_size_max           0.42 
_exptl_crystal_size_mid           0.30 
_exptl_crystal_size_min           0.12
_exptl_crystal_density_meas       ? 
_exptl_crystal_density_diffrn     1.469 
_exptl_crystal_density_method     'not measured' 
_exptl_crystal_F_000              1696 
_exptl_absorpt_coefficient_mu     0.110 
_exptl_absorpt_correction_type    'multi-scan' 
_exptl_absorpt_correction_T_min   0.961
_exptl_absorpt_correction_T_max   0.987 
_exptl_absorpt_process_details    'ABSCOR (Higashi, 1995)'  
 
_exptl_special_details 
; 
 ? 
; 
 
_diffrn_ambient_temperature       98(2) 
_diffrn_radiation_wavelength      0.71073 
_diffrn_radiation_type            MoK\a 
_diffrn_radiation_source          'sealed tube' 
_diffrn_radiation_monochromator   graphite 
_diffrn_measurement_device_type   
;
Saturn724 (2x2 bin mode)
; 
_diffrn_measurement_method        \w 
_diffrn_detector_area_resol_mean  28.5714 
_diffrn_standards_number          0 
_diffrn_standards_interval_count  0 
_diffrn_standards_interval_time   ? 
_diffrn_standards_decay_%         '<1'
_diffrn_reflns_number             9049 
_diffrn_reflns_av_R_equivalents   0.0706 
_diffrn_reflns_av_sigmaI/netI     0.0545 
_diffrn_reflns_limit_h_min        -14 
_diffrn_reflns_limit_h_max        15 
_diffrn_reflns_limit_k_min        -15 
_diffrn_reflns_limit_k_max        13 
_diffrn_reflns_limit_l_min        -31 
_diffrn_reflns_limit_l_max        28 
_diffrn_reflns_theta_min          4.10 
_diffrn_reflns_theta_max          27.47 
_diffrn_reflns_reduction_process  'Lp corrections applied'
_reflns_number_total              2053 
_reflns_number_gt                 1526 
_reflns_threshold_expression      >2sigma(I) 
 
_computing_data_collection
;
CrystalClear-SM Expert 2.0 r5 (Rigaku, 2010)
;
_computing_cell_refinement
;
CrystalClear-SM Expert 2.0 r5 (Rigaku, 2010)
;
_computing_data_reduction
;
CrystalClear-SM Expert 2.0 r5 (Rigaku, 2010)
; 
_computing_structure_solution     'SHELXS-97 (Sheldrick, 1990)' 
_computing_structure_refinement   'SHELXL-97 (Sheldrick, 1997)' 
_computing_molecular_graphics     ? 
_computing_publication_material   ? 
 
_refine_special_details 
; 
 Refinement of F^2^ against ALL reflections.  The weighted R-factor wR and 
 goodness of fit S are based on F^2^, conventional R-factors R are based 
 on F, with F set to zero for negative F^2^. The threshold expression of 
 F^2^ > 2sigma(F^2^) is used only for calculating R-factors(gt) etc. and is 
 not relevant to the choice of reflections for refinement.  R-factors based 
 on F^2^ are statistically about twice as large as those based on F, and R- 
 factors based on ALL data will be even larger. 
; 
 
_refine_ls_structure_factor_coef  Fsqd  
_refine_ls_matrix_type            full 
_refine_ls_weighting_scheme       calc  
_refine_ls_weighting_details 
 'calc w=1/[\s^2^(Fo^2^)+(0.0100P)^2^+14.0000P] where P=(Fo^2^+2Fc^2^)/3' 
_atom_sites_solution_primary      direct 
_atom_sites_solution_secondary    difmap 
_atom_sites_solution_hydrogens    geom 
_refine_ls_hydrogen_treatment     mixed 
_refine_ls_extinction_method      none 
_refine_ls_extinction_coef        ? 
_refine_ls_number_reflns          2053 
_refine_ls_number_parameters      100 
_refine_ls_number_restraints      0 
_refine_ls_R_factor_all           0.1000 
_refine_ls_R_factor_gt            0.0850 
_refine_ls_wR_factor_ref          0.1835 
_refine_ls_wR_factor_gt           0.1756 
_refine_ls_goodness_of_fit_ref    1.016 
_refine_ls_restrained_S_all       1.016 
_refine_ls_shift/su_max           0.000 
_refine_ls_shift/su_mean          0.000 
 
loop_ 
 _atom_site_label 
 _atom_site_type_symbol 
 _atom_site_fract_x 
 _atom_site_fract_y 
 _atom_site_fract_z 
 _atom_site_U_iso_or_equiv 
 _atom_site_adp_type 
 _atom_site_occupancy 
 _atom_site_symmetry_multiplicity 
 _atom_site_calc_flag 
 _atom_site_refinement_flags 
 _atom_site_disorder_assembly 
 _atom_site_disorder_group 
N1 N 0.24086(15) 0.60929(16) 0.26190(9) 0.0258(5) Uani 1 1 d . . . 
N2 N 0.34293(15) 0.61013(16) 0.17738(9) 0.0266(5) Uani 1 1 d . . . 
N3 N 0.43708(16) 0.61278(17) 0.26383(9) 0.0285(5) Uani 1 1 d . . . 
N4 N 0.15363(17) 0.6107(2) 0.17886(11) 0.0370(6) Uani 1 1 d . . . 
N5 N 0.53036(17) 0.6074(2) 0.18192(11) 0.0348(6) Uani 1 1 d . . . 
N6 N 0.33601(19) 0.6063(2) 0.34276(10) 0.0345(5) Uani 1 1 d . . . 
C1 C 0.24821(18) 0.61110(18) 0.20685(11) 0.0269(5) Uani 1 1 d . . . 
C2 C 0.43409(18) 0.61154(19) 0.20887(10) 0.0259(5) Uani 1 1 d . . . 
C3 C 0.33839(19) 0.61086(19) 0.28792(10) 0.0265(5) Uani 1 1 d . . . 
H6A H 0.275(3) 0.605(2) 0.3644(12) 0.032 Uiso 1 1 d . . . 
H5B H 0.588(3) 0.612(2) 0.1997(12) 0.032 Uiso 1 1 d . . . 
H5A H 0.542(2) 0.611(2) 0.1444(13) 0.032 Uiso 1 1 d . . . 
H4A H 0.161(2) 0.628(2) 0.1426(12) 0.032 Uiso 1 1 d . . . 
H4B H 0.085(2) 0.611(2) 0.1968(12) 0.032 Uiso 1 1 d . . . 
H6B H 0.383(3) 0.616(2) 0.3656(12) 0.032 Uiso 1 1 d . . . 

N7  N 0.37404(19) 0.4892(2) 0.51154(10) 0.0512(5) Uani 1 1 d . . . 
C4  C 0.36665(19) 0.52900(19) 0.47097(10) 0.0539(5) Uani 1 1 d . . . 
C5  C 0.37404(19) 0.37190(19) 0.50454(10) 0.0721(5) Uani 1 1 d . . .
C6  C 0.37404(19) 0.55420(19) 0.56154(10) 0.0740(5) Uani 1 1 d . . . 
O1  O 0.35685(19) 0.63196(18) 0.46503(10) 0.0636(5) Uani 1 1 d . . .
 
H7  H 0.36999(17) 0.4971(28) 0.42613(10) 0.11 Uiso 1 1 d . . . 
H8A H 0.28850  0.33796  0.51364 0.11 Uiso 1 1 d . . . 
H8B H 0.43632  0.33273  0.53353 0.11 Uiso 1 1 d . . . 
H8C H 0.39730  0.35198  0.46039 0.11 Uiso 1 1 d . . . 
H9A H 0.42821  0.63081  0.56151 0.11 Uiso 1 1 d . . . 
H9B H 0.40752  0.49227  0.59242 0.11 Uiso 1 1 d . . . 
H9C H 0.28639  0.57789  0.57332 0.11 Uiso 1 1 d . . . 
	
 
loop_ 
 _atom_site_aniso_label 
 _atom_site_aniso_U_11 
 _atom_site_aniso_U_22 
 _atom_site_aniso_U_33 
 _atom_site_aniso_U_23 
 _atom_site_aniso_U_13 
 _atom_site_aniso_U_12 
N1 0.0165(9) 0.0240(9) 0.0370(12) -0.0023(8) 0.0005(8) -0.0004(7) 
N2 0.0169(9) 0.0232(9) 0.0397(12) 0.0010(8) 0.0012(8) 0.0003(7) 
N3 0.0178(9) 0.0324(11) 0.0352(12) -0.0003(9) 0.0014(8) -0.0008(7) 
N4 0.0169(10) 0.0536(15) 0.0405(13) 0.0014(11) 0.0001(9) 0.0010(9) 
N5 0.0165(10) 0.0476(13) 0.0403(13) -0.0013(11) 0.0025(9) -0.0020(9) 
N6 0.0185(10) 0.0483(14) 0.0367(12) -0.0015(10) 0.0000(9) -0.0010(9) 
C1 0.0188(11) 0.0198(11) 0.0421(14) 0.0026(9) 0.0025(9) 0.0003(8) 
C2 0.0186(10) 0.0222(11) 0.0370(13) 0.0008(9) 0.0005(9) -0.0014(8) 
C3 0.0196(10) 0.0206(10) 0.0394(13) -0.0025(9) 0.0006(9) 0.0007(8)
O1 0.115(3) 0.0301(17) 0.0441(19) -0.0081(15) -0.0115(19) 0.0013(18)
C4 0.090(4) 0.034(3) 0.038(2) -0.011(2) -0.016(2) 0.004(2)
N7 0.081(3) 0.0314(19) 0.042(2) -0.0130(17) -0.017(2) 0.0058(19)
C5 0.086(4) 0.072(4) 0.054(3) -0.024(3) -0.015(3) 0.014(3)
C6 0.098(5) 0.038(3) 0.085(4) -0.023(3) -0.037(4) -0.002(3)
 
 
_geom_special_details 
; 
 All esds (except the esd in the dihedral angle between two l.s. planes) 
 are estimated using the full covariance matrix.  The cell esds are taken 
 into account individually in the estimation of esds in distances, angles 
 and torsion angles; correlations between esds in cell parameters are only 
 used when they are defined by crystal symmetry.  An approximate (isotropic) 
 treatment of cell esds is used for estimating esds involving l.s. planes. 
; 
 
loop_ 
 _geom_bond_atom_site_label_1 
 _geom_bond_atom_site_label_2 
 _geom_bond_distance 
 _geom_bond_site_symmetry_2 
 _geom_bond_publ_flag 
N1 C3 1.345(3) . ? 
N1 C1 1.347(3) . ? 
N2 C2 1.348(3) . ? 
N2 C1 1.357(3) . ? 
N3 C3 1.336(3) . ? 
N3 C2 1.342(3) . ? 
N4 C1 1.337(3) . ? 
N4 H4A 0.91(3) . ? 
N4 H4B 0.94(3) . ? 
N5 C2 1.343(3) . ? 
N5 H5B 0.82(3) . ? 
N5 H5A 0.93(3) . ? 
N6 C3 1.340(3) . ? 
N6 H6A 0.91(3) . ? 
N6 H6B 0.81(3) . ? 
 
loop_ 
 _geom_angle_atom_site_label_1 
 _geom_angle_atom_site_label_2 
 _geom_angle_atom_site_label_3 
 _geom_angle 
 _geom_angle_site_symmetry_1 
 _geom_angle_site_symmetry_3 
 _geom_angle_publ_flag 
C3 N1 C1 114.4(2) . . ? 
C2 N2 C1 113.2(2) . . ? 
C3 N3 C2 114.5(2) . . ? 
C1 N4 H4A 114.2(18) . . ? 
C1 N4 H4B 121.6(17) . . ? 
H4A N4 H4B 122(2) . . ? 
C2 N5 H5B 118(2) . . ? 
C2 N5 H5A 128.2(18) . . ? 
H5B N5 H5A 113(3) . . ? 
C3 N6 H6A 126.8(18) . . ? 
C3 N6 H6B 132(2) . . ? 
H6A N6 H6B 100(3) . . ? 
N4 C1 N1 116.9(2) . . ? 
N4 C1 N2 117.3(2) . . ? 
N1 C1 N2 125.8(2) . . ? 
N3 C2 N5 117.8(2) . . ? 
N3 C2 N2 126.3(2) . . ? 
N5 C2 N2 115.8(2) . . ? 
N3 C3 N6 117.4(2) . . ? 
N3 C3 N1 125.7(2) . . ? 
N6 C3 N1 116.9(2) . . ? 

_diffrn_measured_fraction_theta_max    0.990 
_diffrn_reflns_theta_full              27.47 
_diffrn_measured_fraction_theta_full   0.990 
_refine_diff_density_max    0.278 
_refine_diff_density_min   -0.273 
_refine_diff_density_rms    0.063 
